# Supplementary material
Source: PubMed Central journal article supplement (PMC6341286)
Supplement: DC181036SupplementaryData.pdf [file DC181036SupplementaryData.pdf]

SUPPLEMENTARY DATA

**Supplementary Table 1. Comparison of second cohort of RYGB subjects prior to and three months after intervention during OGTT.**

AUC: area under the curve; EX9: exendin<sub>9-39</sub>; HOMA-IR: homeostatic model assessment-insulin ISI: insulin sensitivity index; O-ICR: insulin clearance rate after oral glucose; O-ISR: insulin secretion rate after oral glucose; RYGB: Roux-en-Y gastric bypass; Sal: saline; T2DM: type 2 diabetes mellitus. Mean  $\pm$ SD. \* $p$ <0.05 for paired t-test vs. pre-RYGB; † $p$ <0.05 for paired t-test vs. saline condition.

|                                                 | <b>Pre-RYGB</b> | <b>3 months + Sal</b> | <b>3 months + EX9</b> |
|-------------------------------------------------|-----------------|-----------------------|-----------------------|
| <b>Age (y)</b>                                  | 44.1 $\pm$ 8.6  |                       |                       |
| <b>Gender (% female)</b>                        | 91%             |                       |                       |
| <b>Known T2DM duration (y)</b>                  | 8.26 $\pm$ 7.64 |                       |                       |
| <b>HbA1c (%)</b>                                | 7.89 $\pm$ 1.15 | 6.30 $\pm$ 0.87*      |                       |
| <b>HbA1c (mmol/mol)</b>                         | 62.8 $\pm$ 0.1  | 45.3 $\pm$ 0.08*      |                       |
| <b>Weight (kg)</b>                              | 110 $\pm$ 18.0  | 91.1 $\pm$ 15.2*      |                       |
| <b>BMI (kg/m<sup>2</sup>)</b>                   | 42.1 $\pm$ 5.1  | 34.9 $\pm$ 4.6*       |                       |
| <b>Weight loss (%)</b>                          | -               | 17.1 $\pm$ 3.52       |                       |
| <b>Oral T2DM medication use (# of subjects)</b> | 20/22           | 4/22                  |                       |
| <b>Insulin Use (# subjects)</b>                 | 9/22            | 2/22                  |                       |
| <b>Fasting insulin (pmol/L)</b>                 | 248 $\pm$ 147   | 98.8 $\pm$ 53.5*      |                       |
| <b>Fasting glucose (mmol/L)</b>                 | 7.73 $\pm$ 2.38 | 5.80 $\pm$ 1.00*      |                       |
| <b>120' glucose (mmol/L)</b>                    | 10.7 $\pm$ 3.2  | 9.29 $\pm$ 3.13*      |                       |
| <b>HOMA-IR</b>                                  | 12.1 $\pm$ 7.77 | 3.79 $\pm$ 2.50*      |                       |
| <b>ISI</b>                                      | 1.78 $\pm$ 1.26 | 3.25 $\pm$ 1.68*      |                       |
| <b>O-ISR AUC (pmol/kg)</b>                      | 710 $\pm$ 482   | 1006 $\pm$ 621*       | 514 $\pm$ 411*†       |
| <b>Insulin levels AUC (nmol/L*min)</b>          | 112 $\pm$ 135   | 113 $\pm$ 134         | 55.2 $\pm$ 66.7†      |
| <b>O-ICR (mL/kg/min)</b>                        | 8.45 $\pm$ 4.24 | 11.3 $\pm$ 3.82*      | 13.9 $\pm$ 6.94*†     |
